# Supplementary material for: Metabolic independence drives gut microbial colonization and resilience in health and disease
Source: Springer Nature journal article supplement (doi:10.1186/s13059-023-02924-x), 2023-04-17
Supplement: 13059_2023_2924_MOESM2_ESM.pdf [file 13059_2023_2924_MOESM2_ESM.pdf]

# Supplementary Figures

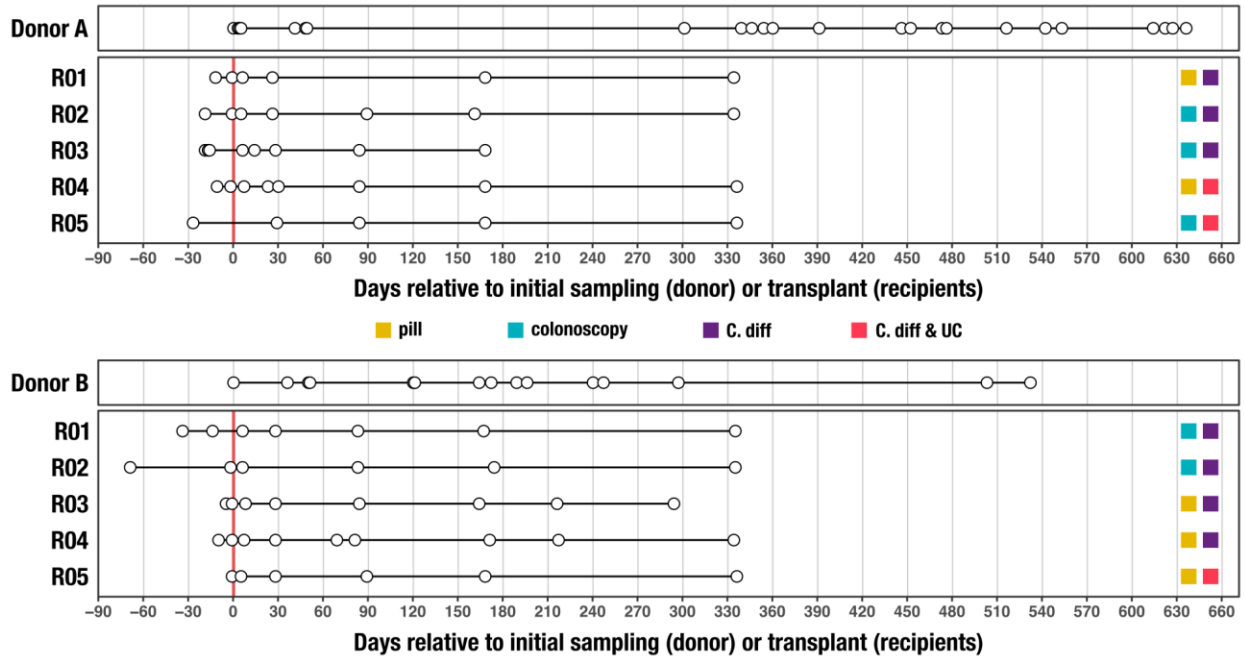

**Fig. S1. Timeline of stool samples collected from FMT study.** Each circle represents a stool sample collected from either an FMT donor or FMT recipient. The thicker, red vertical line at day 0 represents the FMT event for each recipient. FMT method (pill or colonoscopy) and FMT recipient health and disease state (C. diff - chronic recurrent *Clostridium difficile* infection, UC - ulcerative colitis) are indicated on the right.

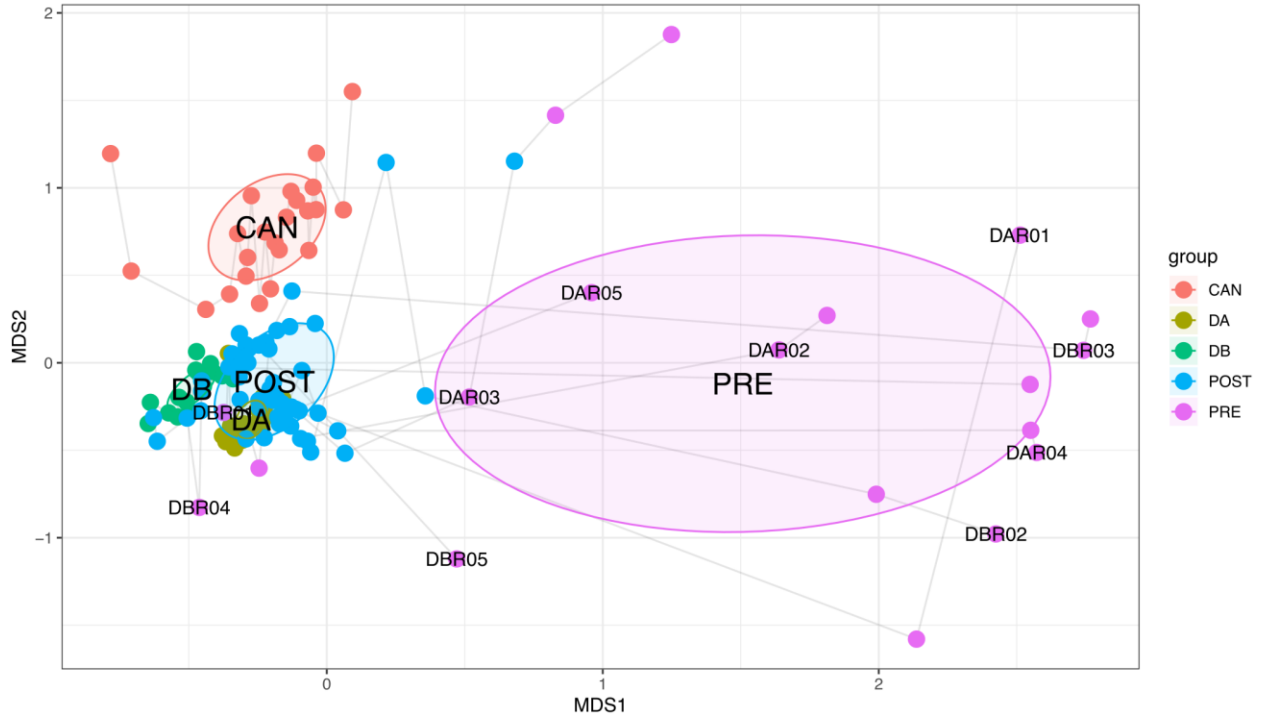

**Fig. S2. Nonmetric multidimensional scaling (NMDS) ordination of the taxonomic composition of donor, recipient, and Canadian gut metagenomes at the genus level based on Morisita-Horn dissimilarity.** Samples from the same participant are joined by lines with the earliest time point labeled. CAN: Canadian gut metagenomes, DA: donor A, DB: donor B, POST: recipients post-FMT, PRE: recipients pre-FMT.

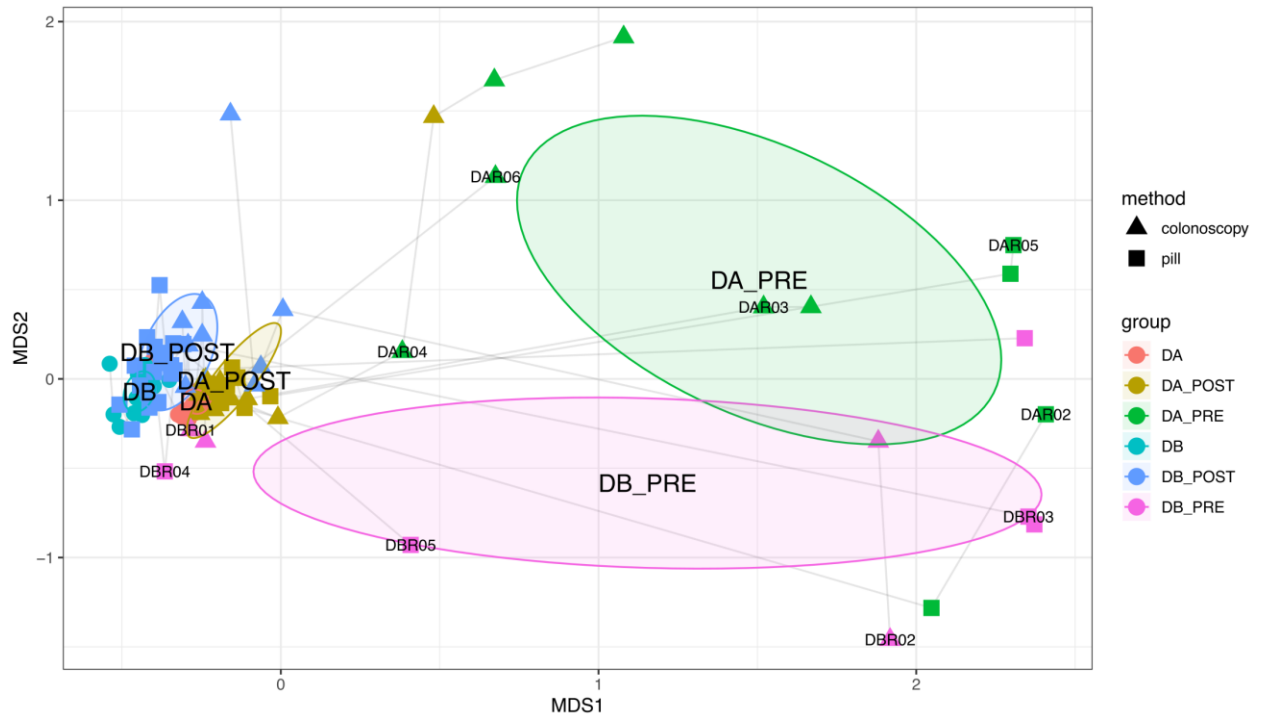

**Fig. S3. Nonmetric multidimensional scaling (NMDS) ordination of the taxonomic composition of the donor and recipient metagenomes at genus level based on Morisita-Horn dissimilarity.** Samples from the same participant are joined by lines with the earliest time point labeled. DA\_POST: donor A recipients post-FMT, DA\_PRE: donor A recipients pre-FMT, DA: donor A, DB\_POST: donor B recipients post-FMT, DB\_PRE: donor B recipients pre-FMT, DB: donor B.

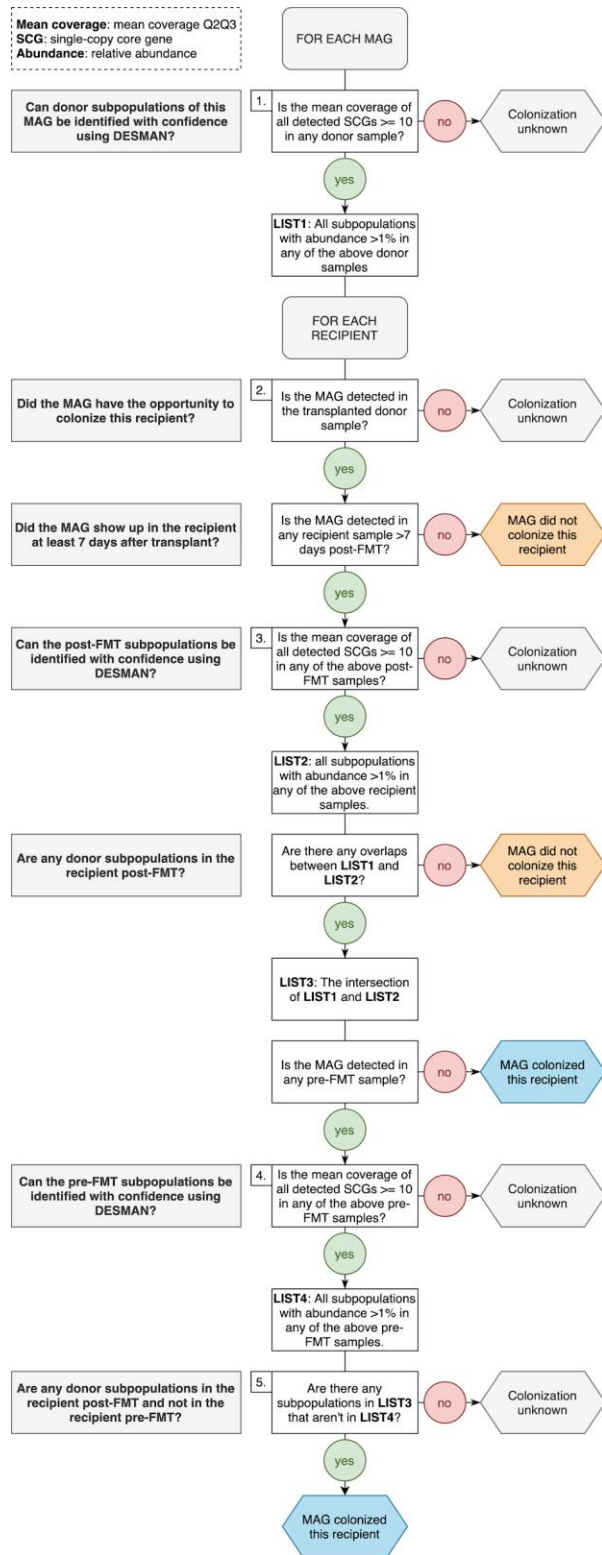

**Fig. S4.** A flowchart outlining our method to assign successful colonization, failed colonization, or undetermined colonization phenotypes to donor-derived populations in the recipients of that donor's stool.
